# Supplementary material for: Weight-cycling over 6 years is associated with pain, physical function and depression in the Osteoarthritis Initiative cohort
Source: Springer Nature journal article supplement (doi:10.1038/s41598-023-44052-3), 2023-10-09
Supplement: 41598_2023_44052_MOESM1_ESM.pdf [file 41598_2023_44052_MOESM1_ESM.pdf]

# Supplemental Figure 1

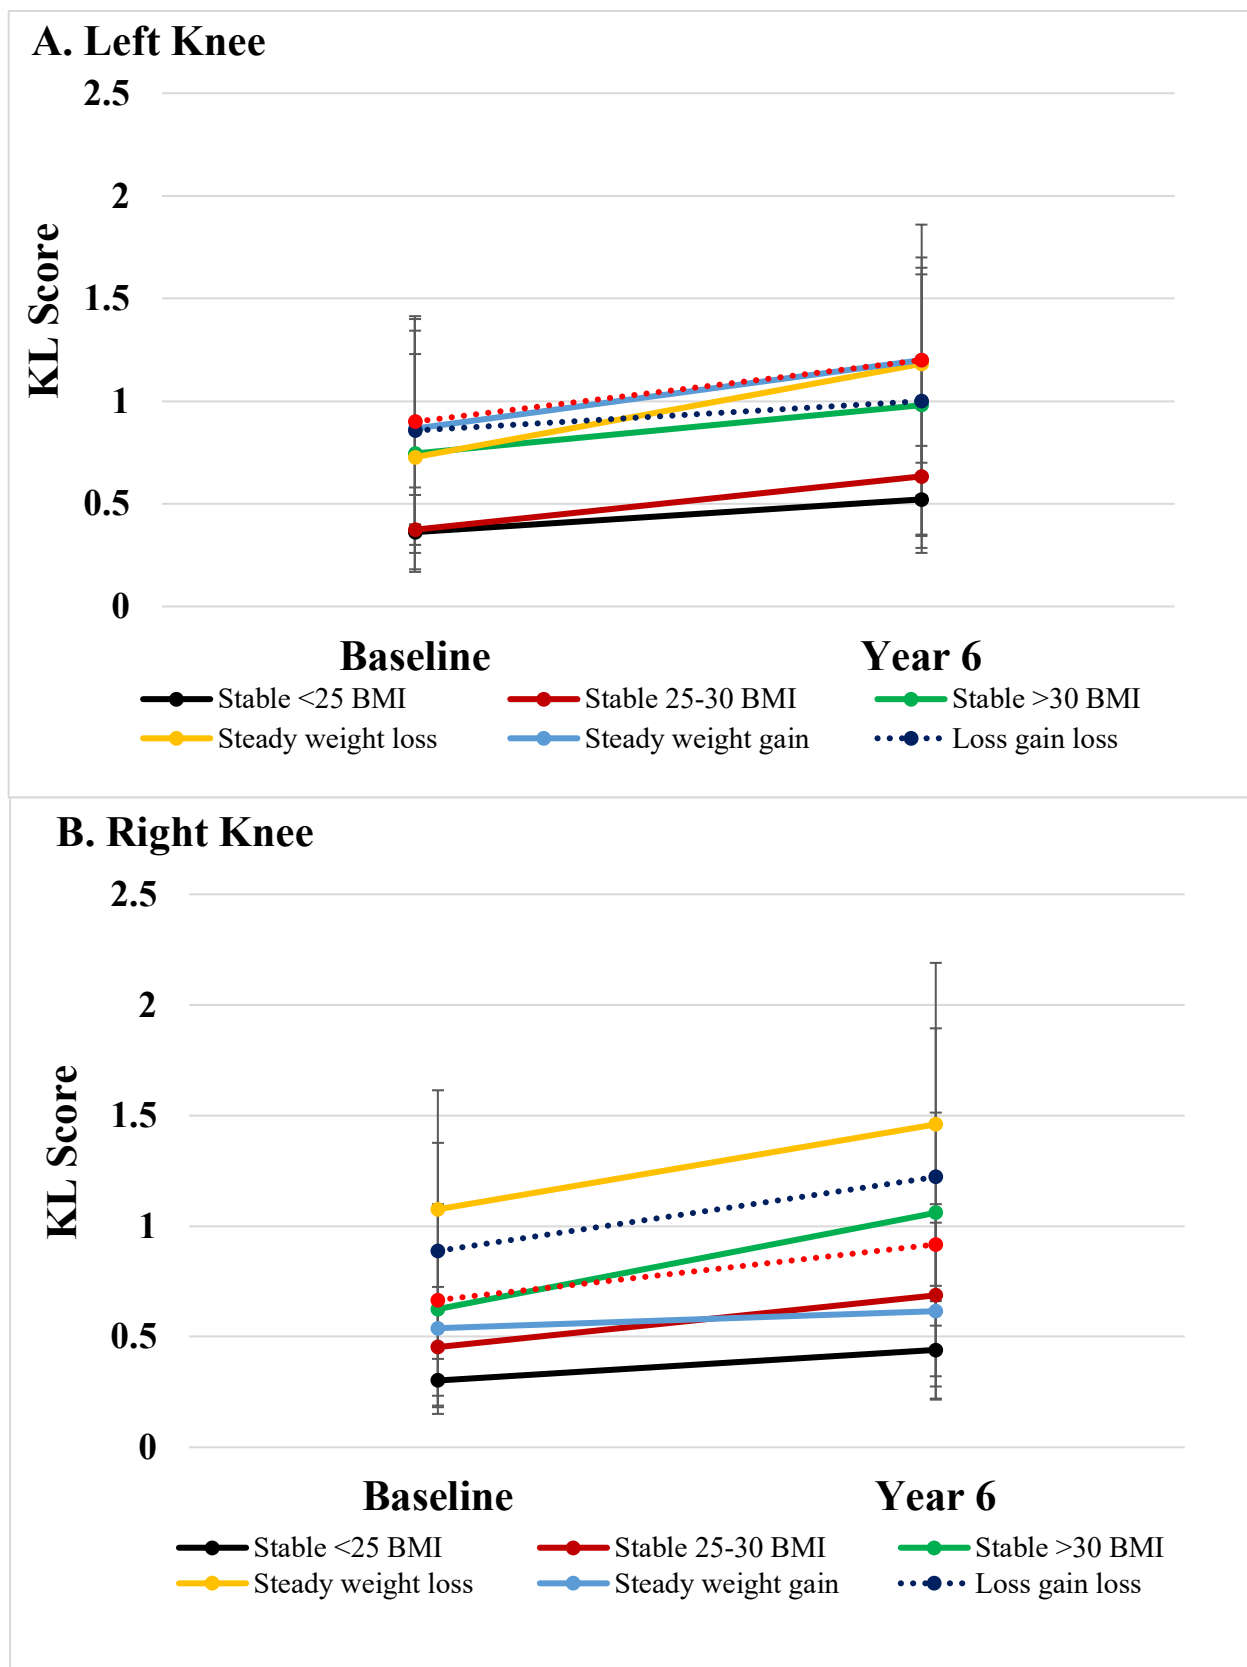

**Supplemental Figure 1.** Kellgren Lawrence (KL) scores at baseline and month 72. Values are means  $\pm$  SD.
